# Supplementary material for: Report of a Chinese Cohort with Activated Phosphoinositide 3-Kinase δ Syndrome
Source: Springer Nature journal article supplement (doi:10.1007/s10875-018-0568-x), 2018-11-01
Supplement: MOESM4 [file 16304514]

## Sheet: Sheet1
Supplemental Table 1. Gene list in the RT² Profiler PCR Array
AKT1	EIF4E	ILK	PIK3CA	PRKAB2	RPS6	STK11
AKT1S1	EIF4EBP1	INS	PIK3CB	PRKAG1	RPS6KA1	STRADB
AKT2	EIF4EBP2	INSR	PIK3CD	PRKAG2	RPS6KA2	TELO2
AKT3	FKBP1A	IRS1	PIK3CG	PRKAG3	RPS6KA5	TP53
CAB39	FKBP8	MAPK1	PLD1	PRKCA	RPS6KB1	TSC1
CAB39L	GSK3B	MAPK3	PLD2	PRKCB	RPS6KB2	TSC2
CDC42	HIF1A	MAPKAP1	PPP2CA	PRKCE	RPTOR	ULK1
CHUK	HRAS	MLST8	PPP2R2B	PRKCG	RRAGA	ULK2
DDIT4	HSPA4	MTOR	PPP2R4	PTEN	RRAGB	VEGFA
DDIT4L	IGF1	MYO1C	PRKAA1	RHEB	RRAGC	VEGFB
DEPTOR	IGFBP3	PDPK1	PRKAA2	RHOA	RRAGD	VEGFC
EIF4B	IKBKB	PIK3C3	PRKAB1	RICTOR	SGK1	YWHAQ
