# Supplementary material for: Report of a Chinese Cohort with Activated Phosphoinositide 3-Kinase δ Syndrome
Source: Springer Nature journal article supplement (doi:10.1007/s10875-018-0568-x), 2018-11-01
Supplement: MOESM8 [file 16304514]

## Sheet: Sheet1
Supplemental Table.5 The change of EBV DNA copies and the size of liver and spleen.
	Liver size#				Spleen size#				EBV DNA copies*
	0 month	3 months	6 months	12 months	0 month	3 months	6 months	12 months	0 month	3 months	6 months	12 months
Patient with rapamycin
P1	3cm	1.5cm	1.5cm	0cm	4cm	4cm	4cm	0cm	1.22E+05	5.60E+04	5.70E+04	2.24E+03
P2	11cm	3cm	3cm	5cm&	14cm	8cm	5cm	6cm&	1.12E+05	1.16E+05	5.09E+04
P5	6.7cm	5.5cm	0cm	0cm	13.8cm	8cm	3cm	2cm	3.14E+04	2.04E+04	1.19E+04	4.11E+03
P10	1.5cm	0cm			5.5cm	3.4cm			6.92E+03
Patient without rapamycin
P3	9cm				16cm
P6	3.5cm	3.5cm	5cm	5cm	5.5cm	7.5cm	7.5cm	9.5cm	2.76E+03
P7	1cm		3cm		2cm		3cm		2.28E+03
P8	3cm				2cm
P9	5cm				7.5cm
P11	10cm		8cm		14cm		10cm		2.64E+03		24000
P12	7cm		8cm		11cm		13cm		3.25E+05		17600
P13	2cm	5cm	5cm		5cm	6cm	10cm		4.67E+03		12800
P14	13cm				15cm				4.23E+04
P15	0cm				0cm
*The EBV DNA copies were detected by the total DNA copies in the peripheral blood mononuclear cells.
#The sizes of liver and spleen were measured infracostal x cm.
&Patient 2 stopped rapamycin after six months' treatment.
